# Supplementary material for: Inequalities in use of hospitals for childbirth among rural women in sub-Saharan Africa: a comparative analysis of 18 countries using Demographic and Health Survey data
Source: PubMed Central journal article supplement — BMJ Glob Health. 2024 Jan 23;9(1):e013029. doi: 10.1136/bmjgh-2023-013029 (PMC10806834; doi:10.1136/bmjgh-2023-013029), 2024-01-23
Supplement: bmjgh-2023-013029supp002.pdf [file bmjgh-2023-013029supp002.pdf]

Supplementary Table 1 – Classification of facilities by country

| Country       | Facility                               |                                                    |                                     |                                     |                                       |                                    |                                |                                              |                                         |                                |                                     |                                  |                                |                    |                         |                      |                  |       |  |
|---------------|----------------------------------------|----------------------------------------------------|-------------------------------------|-------------------------------------|---------------------------------------|------------------------------------|--------------------------------|----------------------------------------------|-----------------------------------------|--------------------------------|-------------------------------------|----------------------------------|--------------------------------|--------------------|-------------------------|----------------------|------------------|-------|--|
| Angola        | central hospital                       | provincial hospital                                | municipal hospital                  | health centre/post                  | maternity                             | other public sector                | private hospital/clinic        | medical centre                               | medical post                            |                                |                                     |                                  |                                |                    |                         |                      |                  |       |  |
| Benin         | government hospital                    | ci gov health professional                         | ci gov health professional          | unité villageoise                   | other public sector                   | private hospital/clinic            | center/hôpital confessionnelle | other private sector                         | other                                   |                                |                                     |                                  |                                |                    |                         |                      |                  |       |  |
| Burundi       | government hospital                    | regional hospital                                  | district hospital                   | public health center                | other public sector                   | registered hospital                | registered health centre       | other registered health sector               | private hospital/clinic                 | private health centre          | other private sector                | other                            |                                |                    |                         |                      |                  |       |  |
| Cameroun      | government hospital                    | integrated health center/dispensary                | sub-divisional medical center       | other public sector                 | confessional hospital/clinic          | private lay hospital/clinic        | medical cabinet                | other private sector                         | other                                   |                                |                                     |                                  |                                |                    |                         |                      |                  |       |  |
| Ethiopia      | government hospital                    | government health center                           | government health post              | private hospital                    | ngo: health facility                  | ngo: other health facility         | other                          |                                              |                                         |                                |                                     |                                  |                                |                    |                         |                      |                  |       |  |
| Gambia        | government hospital                    | government health center                           | government health post              | private hospital/clinic             | ngo hospital/clinic                   | other                              |                                |                                              |                                         |                                |                                     |                                  |                                |                    |                         |                      |                  |       |  |
| Ghana         | government hospital                    | government regional hospital                       | government prefectorial hospital    | government health center            | government health post                | private hospital/clinic            | clinic agbeif                  | private care clinic                          | other                                   |                                |                                     |                                  |                                |                    |                         |                      |                  |       |  |
| Ghana         | government hospital                    | govt health center                                 | government health clinic            | other public sector                 | private hospital/clinic               | other private sector               | other                          |                                              |                                         |                                |                                     |                                  |                                |                    |                         |                      |                  |       |  |
| Malawi        | government hospital                    | government health center                           | government health post/outreach     | other public sector                 | private hospital/clinic               | CHAM/mission hospital              | CHAM/mission health center     | blm                                          | other                                   |                                |                                     |                                  |                                |                    |                         |                      |                  |       |  |
| Mali          | national hospital                      | regional hospital                                  | reference health center             | community health center             | dispensary/maternity                  | other public sector                | private hospital/clinic        | private doctor                               | private medical care office             | health cabinet/CHW             | other private medical sector        | other                            |                                |                    |                         |                      |                  |       |  |
| Nigeria       | government hospital                    | government health center                           | government health post              | other public sector                 | private hospital/clinic               | other public sector                | other                          |                                              |                                         |                                |                                     |                                  |                                |                    |                         |                      |                  |       |  |
| Rwanda        | referral hospital                      | provincial/district hospital                       | health center                       | health post                         | other public sector                   | polyclinic                         | clinic                         | dispensary                                   | other private medical sector            | other                          |                                     |                                  |                                |                    |                         |                      |                  |       |  |
| Senegal       | government hospital                    | government health center/maternity                 | government health post              | government case de santé            | government field worker               | other public sector                | private hospital/clinic        | other private sector                         | other                                   |                                |                                     |                                  |                                |                    |                         |                      |                  |       |  |
| Sierra Leone  | government hospital                    | government health center                           | government health post              | other public sector                 | private hospital/clinic               | other                              |                                |                                              |                                         |                                |                                     |                                  |                                |                    |                         |                      |                  |       |  |
| Tanzania      | national/zonal referral/spec hospital  | regional referral hospital (government/parastatal) | regional hospital (govt/parastatal) | district hospital (govt/parastatal) | health center (government/parastatal) | dispensary (government/parastatal) | clinic (government/parastatal) | referral/spec hospital (religious/voluntary) | district hospital (religious/voluntary) | hospital (religious/voluntary) | health center (religious/voluntary) | dispensary (religious/voluntary) | specialized hospital (private) | hospital (private) | health center (private) | dispensary (private) | clinic (private) | other |  |
| Uganda        | government hospital                    | government health center                           | other public sector                 | private hospital/clinic             | other private sector                  | other                              |                                |                                              |                                         |                                |                                     |                                  |                                |                    |                         |                      |                  |       |  |
| Zambia        | government hospital                    | government health center                           | government health post              | other public sector                 | private hospital/clinic               | mission hospital/clinic            | other private sector           | other                                        |                                         |                                |                                     |                                  |                                |                    |                         |                      |                  |       |  |
| Zimbabwe      | central hospital                       | provincial hospital                                | district hospital                   | rural hospital                      | urban municipal clinic                | other public                       | rural health centre            | private hospital/clinic                      | other private sector                    | mission hospital/clinic        | other                               |                                  |                                |                    |                         |                      |                  |       |  |
| CHAM          | Christian Health Association of Malawi |                                                    |                                     |                                     |                                       |                                    |                                |                                              |                                         |                                |                                     |                                  |                                |                    |                         |                      |                  |       |  |
| Hospital      |                                        |                                                    |                                     |                                     |                                       |                                    |                                |                                              |                                         |                                |                                     |                                  |                                |                    |                         |                      |                  |       |  |
| PHC facility  |                                        |                                                    |                                     |                                     |                                       |                                    |                                |                                              |                                         |                                |                                     |                                  |                                |                    |                         |                      |                  |       |  |
| Private/other |                                        |                                                    |                                     |                                     |                                       |                                    |                                |                                              |                                         |                                |                                     |                                  |                                |                    |                         |                      |                  |       |  |



Supplementary Table 3 – Characteristics of rural women with a live birth, by country, across 18 sub-Saharan African countries with a recent DHS survey

| Country       | DHS Year | Number of births analysed | Birth location  |                 |       |                 |             |                 |               |                 |          |                 | PIC to hospital births ratio | Parity at index birth n, % (95% CI) |                 |       |                 |              | Maternal age in years at index birth | Women married/cohabiting | Education       |       |                     |       |                         | Percentage Cleaners sections out of all births (95% CI) | % rural births in private sector out of total births | Rural women parity 25 with private sector birth out of rural women 25 (n, % and 95% CI) |      |            |         |                 |       |                 |      |                 |
|---------------|----------|---------------------------|-----------------|-----------------|-------|-----------------|-------------|-----------------|---------------|-----------------|----------|-----------------|------------------------------|-------------------------------------|-----------------|-------|-----------------|--------------|--------------------------------------|--------------------------|-----------------|-------|---------------------|-------|-------------------------|---------------------------------------------------------|------------------------------------------------------|-----------------------------------------------------------------------------------------|------|------------|---------|-----------------|-------|-----------------|------|-----------------|
|               |          |                           | Facility births |                 | Home  |                 | PIC         |                 | Private/other |                 | Hospital |                 |                              | 0                                   | 1-4             |       | ≥5              | No education |                                      |                          | Primary         |       | Secondary or higher |       | Years of education (SD) |                                                         |                                                      |                                                                                         |      |            |         |                 |       |                 |      |                 |
|               |          |                           | %               | Number (95% CI) | %     | Number (95% CI) | %           | Number (95% CI) | %             | Number (95% CI) | %        | Number (95% CI) |                              | %                                   | Number (95% CI) | %     | Number (95% CI) | %            |                                      |                          | Number (95% CI) | %     | Number (95% CI)     | %     | Number (95% CI)         |                                                         |                                                      |                                                                                         | Mean | SD         | %       | Number (95% CI) | %     | Number (95% CI) | %    | Number (95% CI) |
| Angola        | 2015-16  | 6302                      | 18.6            | 1290(6302)      | 81.4  | 5012(6302)      | 10.7        | 659(6302)       | 10.7          | 659(6302)       | 1.46     | 18.4            | 17.3-19.6                    | 57.4                                | 55.6-59.2       | 24.2  | 22.5-26.0       | 26.4         | 7.3                                  | 77.5                     | 75.5-79.4       | 49.1  | 44.8-55.4           | 43.1  | 39.5-46.8               | 7.8                                                     | 6.2-9.8                                              | 2.1                                                                                     | 2.7  | 0.3        | 0.2-0.7 | 0.2             | 0.0-7 |                 |      |                 |
| Benin         | 2016-17  | 7979                      | 6463            | 7979            | 1516  | 7979            | 4509        | 7979            | 851           | 7979            | 1103     | 7979            | 1483                         | 7979                                | 4627            | 7979  | 1706            | 7979         | 7546                                 | 7979                     | 5845            | 7979  | 1290                | 7979  | 844                     | 7979                                                    | 674                                                  | 7979                                                                                    | 113  | 1654       | 113     | 1654            |       |                 |      |                 |
| Burundi       | 2016-17  | 10900                     | 9447            | 10900           | 1453  | 10900           | 7005        | 10900           | 777           | 10900           | 1665     | 10900           | 1977                         | 10900                               | 6166            | 10900 | 2557            | 10900        | 9926                                 | 10900                    | 5458            | 10900 | 4677                | 10900 | 765                     | 10900                                                   | 253                                                  | 10900                                                                                   | 46   | 2413       | 46      | 2413            |       |                 |      |                 |
| Cameroon      | 2018     | 5326                      | 2891            | 5326            | 2435  | 5326            | 1622        | 5326            | 843           | 5326            | 426      | 5326            | 1071                         | 5326                                | 1246            | 5326  | 1076            | 4497         | 4475                                 | 5326                     | 1705            | 5326  | 2042                | 5326  | 1578                    | 5326                                                    | 329                                                  | 5326                                                                                    | 170  | 2141       | 329     | 5326            |       |                 |      |                 |
| Ethiopia      | 2019     | 4357                      | 1731            | 4357            | 2626  | 4357            | 1297        | 4357            | 1174          | 4357            | 317      | 4357            | 849                          | 4357                                | 2431            | 4357  | 1077            | 4357         | 4128                                 | 4357                     | 2710            | 4357  | 1330                | 4357  | 317                     | 4357                                                    | 173                                                  | 4357                                                                                    | 51   | 3757       | 173     | 4357            |       |                 |      |                 |
| Gambia        | 2019-20  | 4538                      | 3352            | 4538            | 1186  | 4538            | 2529        | 4538            | 640           | 4538            | 174      | 4538            | 851                          | 4538                                | 2455            | 4538  | 1237            | 4538         | 4390                                 | 4538                     | 2908            | 4538  | 839                 | 4538  | 391                     | 4538                                                    | 453                                                  | 4538                                                                                    | 37   | 3712       | 453     | 4538            |       |                 |      |                 |
| Guinea        | 2018     | 5575                      | 2080            | 5575            | 3495  | 5575            | 1742        | 5575            | 955           | 5575            | 241      | 5575            | 962                          | 5575                                | 3462            | 5575  | 1151            | 5575         | 5361                                 | 5575                     | 4925            | 5575  | 252                 | 5575  | 252                     | 5575                                                    | 252                                                  | 5575                                                                                    | 252  | 5575       | 252     | 5575            |       |                 |      |                 |
| Liberia       | 2019-20  | 3730                      | 398             | 3730            | 3332  | 3730            | 340         | 3730            | 340           | 3730            | 1.1      | 3730            | 11.2                         | 3730                                | 622             | 3730  | 200             | 3730         | 2813                                 | 3730                     | 1293            | 3730  | 609                 | 3730  | 609                     | 3730                                                    | 609                                                  | 3730                                                                                    | 609  | 3730       | 609     | 3730            |       |                 |      |                 |
| Malawi        | 2015-16  | 14232                     | 13228           | 14232           | 1004  | 14232           | 8203        | 14232           | 450           | 14232           | 13228    | 14232           | 3499                         | 14232                               | 8472            | 14232 | 2261            | 14232        | 11906                                | 14232                    | 9957            | 14232 | 2281                | 14232 | 2281                    | 14232                                                   | 2281                                                 | 14232                                                                                   | 2281 | 14232      | 2281    | 14232           |       |                 |      |                 |
| Mali          | 2018     | 7299                      | 60.4            | 559             | 7299  | 668.8           | 593         | 57.6            | 62.0          | 3.3             | 2.8      | 29.2            | 27.3                         | 21.4                                | 1.79            | 25.1  | 21.1            | 59.3         | 63.8                                 | 83.4                     | 82.8            | 14.9  | 13.9                | 16.0  | 70.2                    | 68.9                                                    | 71.4                                                 | 14.9                                                                                    | 13.9 | 16.0       | 52      | 3.4             | 13.2  | 11.5            | 11.1 |                 |
| Nigeria       | 2018     | 21804                     | 26.6            | 249             | 21804 | 15361           | 21804       | 2807            | 21804         | 1779            | 21804    | 1837            | 21804                        | 4049                                | 21804           | 12018 | 21804           | 5773         | 21804                                | 20877                    | 21804           | 12571 | 21804               | 3373  | 21804                   | 5860                                                    | 21804                                                | 200                                                                                     | 5686 | 200        | 5686    |                 |       |                 |      |                 |
| Rwanda        | 2019-20  | 6300                      | 93.9            | 92              | 6300  | 394             | 6300        | 4048            | 6300          | 1609            | 6300     | 1534            | 6300                         | 3877                                | 6300            | 889   | 6300            | 5258         | 6300                                 | 824                      | 6300            | 4430  | 6300                | 1046  | 6300                    | 1046                                                    | 6300                                                 | 1046                                                                                    | 6300 | 1046       | 6300    |                 |       |                 |      |                 |
| Senegal       | 2019     | 4274                      | 71.8            | 3063            | 4274  | 1294            | 4274        | 2683            | 4274          | 694             | 4274     | 229             | 4274                         | 398                                 | 4274            | 559   | 4274            | 915          | 4274                                 | 4109                     | 4274            | 3129  | 4274                | 661   | 4274                    | 484                                                     | 4274                                                 | 484                                                                                     | 4274 | 484        | 4274    |                 |       |                 |      |                 |
| Sierra Leone  | 2019     | 6720                      | 80.7            | 5407            | 6720  | 1313            | 6720        | 4413            | 6720          | 726             | 6720     | 1367            | 6720                         | 4150                                | 6720            | 1809  | 6720            | 5957         | 6720                                 | 4395                     | 6720            | 1053  | 6720                | 1270  | 6720                    | 1270                                                    | 6720                                                 | 1270                                                                                    | 6720 | 1270       | 6720    |                 |       |                 |      |                 |
| Tanzania      | 2015-16  | 7699                      | 55.7            | 428             | 7699  | 41.2            | 318         | 28.7            | 31.5          | 3.7             | 2.9      | 21.0            | 18.9                         | 23.3                                | 1.33            | 22.6  | 21.4            | 54.1         | 52.6                                 | 55.6                     | 23.3            | 22.9  | 27.7                | 66.3  | 64.0                    | 68.5                                                    | 8.5                                                  | 7.5                                                                                     | 9.7  | 5.1        | 3.5     | 11.1            | 9.5   | 11.0            |      |                 |
| Uganda        | 2016     | 12506                     | 71.1            | 889             | 12506 | 236.9           | 1810        | 38.9            | 38.0          | 41.8            | 15.4     | 14.0            | 16.9                         | 15.9                                | 14.3            | 17.5  | 2.77            | 20.9         | 19.6                                 | 21.4                     | 54.1            | 52.5  | 25.8                | 24.5  | 26.8                    | 67.2                                                    | 65.5                                                 | 66.9                                                                                    | 20.5 | 18.9       | 22.2    | 5.2             | 3.5   | 14              | 12.6 | 15.4            |
| Zambia        | 2018     | 6865                      | 80.2            | 5507            | 6865  | 1358            | 6865        | 342             | 6865          | 513             | 6865     | 1421            | 6865                         | 917                                 | 6865            | 366   | 6865            | 1530         | 6865                                 | 5428                     | 6865            | 914   | 6865                | 1809  | 6865                    | 1809                                                    | 6865                                                 | 1809                                                                                    | 6865 | 1809       | 6865    |                 |       |                 |      |                 |
| Zimbabwe      | 2015     | 3755                      | 73.3            | 276             | 3755  | 23.6            | 889         | 23.3            | 34.5          | 14.8            | 12.3     | 18.0            | 17.2                         | 28.2                                | 34.5            | 1.09  | 24.3            | 23.0         | 66                                   | 64                       | 85.4            | 88.5  | 1.6                 | 1.0   | 2.5                     | 41.9                                                    | 38.9                                                 | 45.0                                                                                    | 36.5 | 33.2       | 60.0    | 8.2             | 2.6   | 11.7            | 9.1  | 15.0            |
| <b>MEDIAN</b> |          |                           | <b>61.1</b>     | <b>72.8</b>     |       | <b>27.5</b>     | <b>54.9</b> | <b>3.8</b>      |               | <b>14.3</b>     |          | <b>3.63</b>     | <b>29.3</b>                  | <b>57.1</b>                         | <b>22.2</b>     |       | <b>88.0</b>     |              | <b>49.9</b>                          |                          | <b>34.7</b>     |       | <b>16.9</b>         |       | <b>2.7</b>              |                                                         |                                                      | <b>4.3</b>                                                                              |      | <b>2.4</b> |         |                 |       |                 |      |                 |

Supplementary Fig 1- *Percentage of rural live births by location of childbirth in countries with a recent DHS survey, by country (ordered by percentage of births in hospital)*

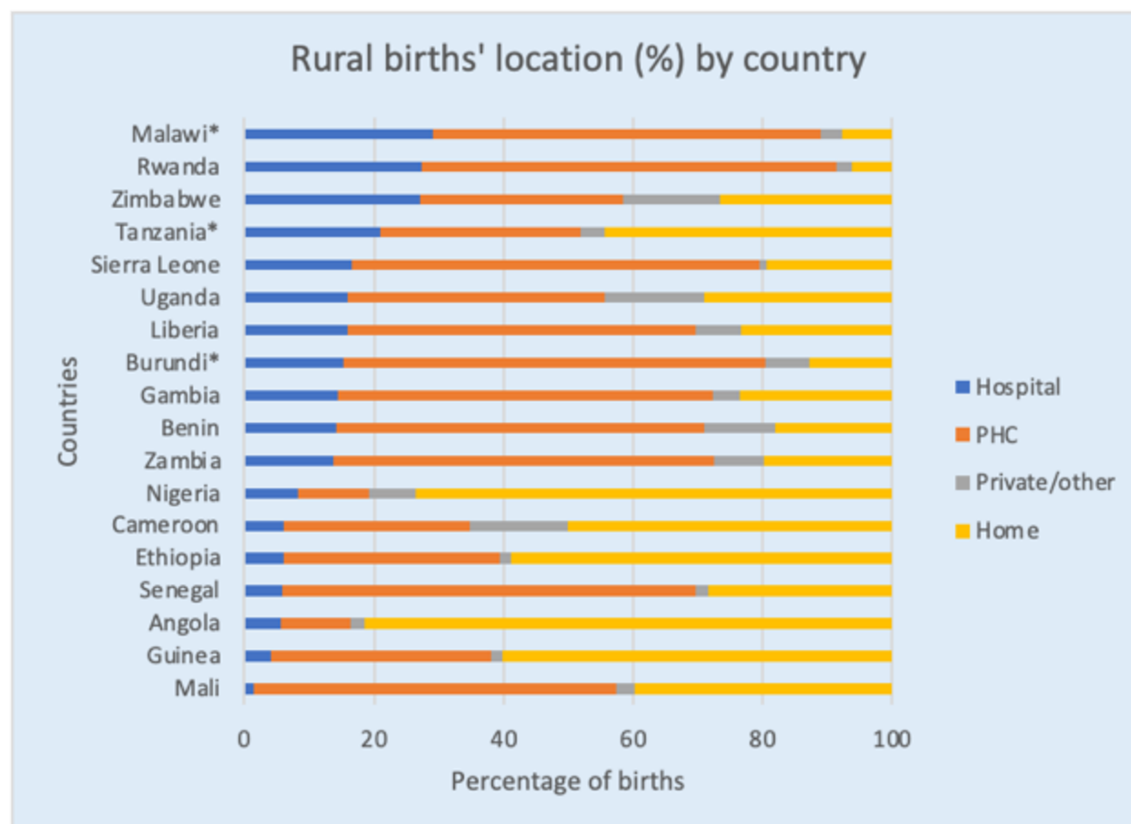

\*Countries where hospitals and PHC categories include faith-based/denominational facilities

Supplementary Table 4 – Hospital births in rural women, by wealth and parity and pp differences, by country

| Country      | Year DHS | All levels of parity |      |           |              |      |           | Nulliparous women |      |           |              |      |           | Women at parity ≥5 |      |           |              |        |          | Percentage point difference between rich and poor women* | p-value of percentage point difference | Percentage point difference between rich nullipara and poor women at parity ≥5 | p-value |              |          |        |              |      |        |              |        |        |                                                             |         |  |  |  |  |  |  |
|--------------|----------|----------------------|------|-----------|--------------|------|-----------|-------------------|------|-----------|--------------|------|-----------|--------------------|------|-----------|--------------|--------|----------|----------------------------------------------------------|----------------------------------------|--------------------------------------------------------------------------------|---------|--------------|----------|--------|--------------|------|--------|--------------|--------|--------|-------------------------------------------------------------|---------|--|--|--|--|--|--|
|              |          | Poor women           |      |           | Rich women   |      |           | All women         |      |           | Poor women   |      |           | Rich women         |      |           | All women    |        |          |                                                          |                                        |                                                                                |         | Poor women   |          |        | Rich women   |      |        |              |        |        |                                                             |         |  |  |  |  |  |  |
|              |          | Number/total         | %    | 95% CI    | Number/total | %    | 95% CI    | Number/total      | %    | 95% CI    | Number/total | %    | 95% CI    | Number/total       | %    | 95% CI    | Number/total | %      | 95% CI   |                                                          |                                        |                                                                                |         | Number/total | %        | 95% CI | Number/total | %    | 95% CI | Number/total | %      | 95% CI | Percentage point difference between richer and poorer women | p-value |  |  |  |  |  |  |
| Angola       | 2015     | 130/3198             | 3.9  | 2.8-5.2   | 325/3198     | 7.7  | 5.9-9.9   | 1075/1194         | 8.1  | 6.3-10.5  | 43/598       | 6.8  | 4.5-10.2  | 76/596             | 9.5  | 6.9-13.0  | 2.7          | 0.21   | 92/1434  | 5.4                                                      | 3.9-7.3                                | 27/803                                                                         | 3.4     | 2.0-5.5      | 65/631   | 8.2    | 5.8-11.6     | 4.9  | 0.00   | 6.1          | <0.001 |        |                                                             |         |  |  |  |  |  |  |
| Benin        | 2017     | 480/3988             | 12.3 | 0.0-15.0  | 623/3991     | 16.1 | 14.0-18.5 | 254/1646          | 15.8 | 13.3-18.7 | 103/720      | 14.5 | 11.2-18.6 | 151/926            | 16.8 | 13.9-20.1 | 2.2          | 0.30   | 221/1706 | 13.3                                                     | 10.9-16.3                              | 105/1037                                                                       | 9.9     | 7.5-12.8     | 116/669  | 18.3   | 14.2-23.3    | 8.5  | <0.001 | 6.9          | <0.001 |        |                                                             |         |  |  |  |  |  |  |
| Burundi      | 2016     | 596/5453             | 10.8 | 9.2-12.7  | 1069/5447    | 20.0 | 17.3-22.8 | 414/1977          | 20.8 | 18.3-23.4 | 170/1061     | 15.6 | 12.9-18.7 | 244/916            | 26.9 | 23.6-30.4 | 11.3         | <0.001 | 313/2557 | 12.0                                                     | 10.0-14.4                              | 105/1184                                                                       | 8.9     | 6.9-11.6     | 208/1373 | 14.7   | 11.9-18.0    | 5.7  | <0.001 | 17.9         | <0.001 |        |                                                             |         |  |  |  |  |  |  |
| Cameroon     | 2018     | 68/2673              | 2.0  | 1.4-2.9   | 358/2653     | 11.5 | 9.6-13.7  | 103/1071          | 8.1  | 6.3-10.3  | 17/470       | 2.6  | 1.5-4.5   | 86/601             | 13.6 | 10.6-17.4 | 11.1         | <0.001 | 70/1246  | 3.7                                                      | 2.7-5.1                                | 13/711                                                                         | 1.3     | 0.7-2.4      | 57/535   | 7.8    | 5.5-10.9     | 6.5  | <0.001 | 12.3         | <0.001 |        |                                                             |         |  |  |  |  |  |  |
| Ethiopia     | 2019     | 79/2175              | 2.1  | 1.3-3.4   | 238/2182     | 8.4  | 6.6-10.8  | 123/849           | 14.1 | 10.6-18.5 | 15/358       | 2.5  | 1.2-5.1   | 108/511            | 18.4 | 13.9-24.1 | 15.9         | <0.001 | 46/1077  | 3.1                                                      | 2.0-4.9                                | 24/613                                                                         | 2.2     | 1.0-5.0      | 22/464   | 3.9    | 2.3-6.6      | 1.7  | 0.20   | 16.2         | <0.001 |        |                                                             |         |  |  |  |  |  |  |
| Gambia       | 2019     | 299/2263             | 12.9 | 9.9-16.7  | 350/2275     | 15.4 | 11.4-20.5 | 171/851           | 20.8 | 16.0-26.6 | 81/407       | 20.8 | 16.0-26.5 | 90/444             | 20.8 | 14.5-28.9 | 0.0          | 1.00   | 170/1237 | 12.9                                                     | 9.7-17.0                               | 79/643                                                                         | 11.4    | 7.9-16.1     | 91/594   | 14.5   | 10.1-20.4    | 3.1  | 0.30   | 9.5          | <0.001 |        |                                                             |         |  |  |  |  |  |  |
| Guinea       | 2018     | 82/2782              | 2.8  | 2.1-3.8   | 161/2793     | 5.5  | 4.4-6.8   | 68/962            | 6.9  | 5.3-8.9   | 22/427       | 4.9  | 3.1-7.6   | 46/535             | 8.5  | 6.3-11.3  | 3.7          | 0.04   | 36/1151  | 3.0                                                      | 2.0-4.6                                | 12/604                                                                         | 2.0     | 1.1-3.5      | 24/547   | 4.1    | 2.4-6.9      | 2.1  | 0.06   | 6.6          | <0.001 |        |                                                             |         |  |  |  |  |  |  |
| Liberia      | 2019     | 255/1873             | 14.6 | 2.1-17.6  | 319/1857     | 17.1 | 14.4-20.2 | 149/763           | 21.1 | 17.7-25.1 | 64/319       | 23.7 | 18.3-30.1 | 85/444             | 19.4 | 15.6-23.9 | 4.3          | 0.20   | 123/957  | 13.9                                                     | 11.0-17.5                              | 53/538                                                                         | 12.1    | 8.7-16.6     | 70/419   | 16.0   | 12.0-20.9    | 3.9  | 0.15   | 7.3          | 0.009  |        |                                                             |         |  |  |  |  |  |  |
| Malawi       | 2015     | 1711/6134            | 25.9 | 3.7-28.1  | 2864/8098    | 32.0 | 29.6-34.5 | 1460/3499         | 38.1 | 35.3-40.8 | 546/1530     | 33.3 | 30.1-36.6 | 914/1969           | 42.1 | 38.7-45.6 | 8.9          | <0.001 | 568/2261 | 23.2                                                     | 20.6-25.9                              | 225/1008                                                                       | 21.3    | 17.9-25.2    | 343/1253 | 24.7   | 21.6-28.1    | 3.3  | 0.15   | 20.8         | <0.001 |        |                                                             |         |  |  |  |  |  |  |
| Mali         | 2018     | 41/3653              | 1.2  | 0.8-1.7   | 71/3646      | 1.8  | 1.2-2.8   | 28/1265           | 2.1  | 1.3-3.3   | 9/524        | 1.9  | 0.9-3.7   | 19/741             | 2.2  | 1.2-3.9   | 0.3          | 0.69   | 20/1898  | 0.9                                                      | 0.5-1.7                                | 6/1115                                                                         | 0.5     | 0.2-1.3      | 14/783   | 1.7    | 0.8-3.5      | 1.3  | 0.04   | 1.8          | 0.007  |        |                                                             |         |  |  |  |  |  |  |
| Nigeria      | 2018     | 432/10915            | 4.1  | 3.4-4.9   | 1425/10889   | 12.6 | 11.3-13.9 | 501/4049          | 12.2 | 10.9-13.6 | 120/1804     | 6.8  | 5.4-8.5   | 381/2245           | 16.6 | 14.7-18.6 | 9.7          | <0.001 | 352/5737 | 6.1                                                      | 5.2-7.1                                | 117/3436                                                                       | 3.5     | 2.7-4.5      | 235/2301 | 9.9    | 8.2-11.9     | 6.4  | <0.001 | 13.1         | <0.001 |        |                                                             |         |  |  |  |  |  |  |
| Rwanda       | 2019     | 679/3145             | 21.6 | 9.9-23.5  | 1019/3155    | 32.6 | 29.9-35.3 | 600/1534          | 39.3 | 36.5-42.2 | 259/747      | 34.9 | 31.4-38.7 | 341/787            | 43.1 | 39.1-47.1 | 8.1          | 0.00   | 162/889  | 19.2                                                     | 16.4-22.4                              | 57/478                                                                         | 12.8    | 10.0-16.3    | 105/411  | 26.0   | 21.2-31.5    | 13.2 | <0.001 | 30.3         | <0.001 |        |                                                             |         |  |  |  |  |  |  |
| Senegal      | 2019     | 61/2136              | 2.9  | 2.1-3.8   | 167/2138     | 8.3  | 6.7-10.4  | 84/918            | 8.9  | 6.6-12.0  | 27/425       | 5.8  | 3.7-9.0   | 57/493             | 11.1 | 7.7-15.9  | 5.3          | 0.02   | 34/951   | 4.1                                                      | 2.0-8.6                                | 11/589                                                                         | 1.8     | 0.9-3.6      | 23/362   | 7.1    | 2.8-17.1     | 5.3  | 0.02   | 9.3          | <0.001 |        |                                                             |         |  |  |  |  |  |  |
| Sierra Leone | 2019     | 440/3359             | 12.5 | 0.1-15.5  | 759/3361     | 20.3 | 17.1-23.9 | 290/1367          | 19.8 | 16.5-23.5 | 92/620       | 15.0 | 11.1-19.9 | 198/747            | 23.4 | 19.0-28.5 | 8.5          | 0.01   | 200/1203 | 15.9                                                     | 12.4-20.1                              | 91/646                                                                         | 13.4    | 9.3-18.8     | 109/557  | 18.9   | 14.2-24.6    | 5.5  | 0.09   | 10.1         | 0.002  |        |                                                             |         |  |  |  |  |  |  |
| Tanzania     | 2015     | 537/3859             | 14.6 | 2.3-17.2  | 1208/3840    | 28.9 | 25.9-32.1 | 663/1674          | 37.3 | 33.5-41.2 | 201/747      | 28.9 | 24.1-34.3 | 462/927            | 45.7 | 40.8-50.7 | 16.8         | <0.001 | 306/1901 | 15.0                                                     | 12.6-17.8                              | 129/1065                                                                       | 13.0    | 10.2-16.4    | 177/836  | 18.4   | 14.8-22.6    | 5.4  | 0.02   | 32.7         | <0.001 |        |                                                             |         |  |  |  |  |  |  |
| Uganda       | 2016     | 673/6248             | 11.0 | 9.7-12.5  | 1200/6258    | 20.0 | 17.8-22.4 | 552/2499          | 23.2 | 20.8-25.8 | 200/1173     | 17.1 | 14.5-20.2 | 352/1326           | 27.8 | 24.5-31.4 | 10.7         | <0.001 | 348/3209 | 11.1                                                     | 9.5-13.0                               | 136/1711                                                                       | 7.7     | 6.1-9.5      | 212/1498 | 14.6   | 12.0-17.7    | 7.0  | <0.001 | 20.2         | <0.001 |        |                                                             |         |  |  |  |  |  |  |
| Zambia       | 2018     | 303/3432             | 8.8  | 7.4-10.5  | 668/3433     | 18.3 | 15.8-21.0 | 337/1620          | 20.5 | 17.7-23.6 | 97/774       | 12.8 | 10.1-16.1 | 240/846            | 27.6 | 23.4-32.3 | 14.8         | <0.001 | 182/1580 | 11.1                                                     | 9.1-13.4                               | 61/789                                                                         | 7.4     | 5.6-9.7      | 121/791  | 16.6   | 11.6-18.3    | 9.2  | <0.001 | 20.2         | <0.001 |        |                                                             |         |  |  |  |  |  |  |
| Zimbabwe     | 2015     | 468/1879             | 23.4 | 10.4-26.7 | 628/1876     | 31.3 | 27.6-35.2 | 415/950           | 40.7 | 37.1-44.5 | 171/421      | 38.0 | 32.8-43.5 | 244/529            | 43.3 | 38.0-48.2 | 5.3          | 0.19   | 74/346   | 18.8                                                     | 14.1-24.6                              | 43/206                                                                         | 17.9    | 12.1-25.6    | 31/140   | 20.1   | 13.4-28.9    | 2.2  | 0.66   | 25.4         | <0.001 |        |                                                             |         |  |  |  |  |  |  |
| MEDIAN       |          |                      |      |           |              |      |           |                   |      |           |              |      |           |                    |      |           |              |        |          |                                                          |                                        |                                                                                |         |              |          |        |              |      |        |              |        |        |                                                             |         |  |  |  |  |  |  |

\* significant at 0.05 level

Supplementary Table 5 – sensitivity analysis on Tanzania dataset (including faith-based and public facilities in analysis/excluding faith-based facilities)

| Country               | Year DHS | Rural women at parity 0 |       |           |              |       |              |                                                              | p-value of percentage point difference | Rural women at parity ≥5 |      |           |                      |              |           |                                                             |         |                                                             |         |
|-----------------------|----------|-------------------------|-------|-----------|--------------|-------|--------------|--------------------------------------------------------------|----------------------------------------|--------------------------|------|-----------|----------------------|--------------|-----------|-------------------------------------------------------------|---------|-------------------------------------------------------------|---------|
|                       |          | Poorer women            |       |           | Richer women |       |              |                                                              |                                        | Poorer women             |      |           | Richer women         |              |           |                                                             |         |                                                             |         |
|                       |          | Number/total            | %     | 95% CI    | Number/total | %     | 95% CI       | Percentage point difference between richer and poorer women* |                                        | Poorer women n/total     | %    | 95% CI    | Richer women n/total | %            | 95% CI    | Percentage point difference between richer and poorer women | p-value | Percentage point difference between richer and poorer women | p-value |
| Tanzania <sup>1</sup> | 2015     | 197/734                 | 28.9  | 24.1-34.3 | 314/704      | 44.6  | 39.5-49.8    | 15.7                                                         | <0.001                                 | 119/1009                 | 13.0 | 10.2-16.5 | 102/565              | 17.4         | 13.7-21.9 | 4.5                                                         | 0.06    | 31.7                                                        | <0.001  |
| Tanzania <sup>2</sup> | 2015     | 136/734                 | 20.27 | 16.3-25.0 | 217/704      | 30.71 | 26.4-35.4    | 10.4                                                         | 0.001                                  | 76/1009                  | 7.9  | 5.8-10.7  | 71/565               | 12.06        | 8.9-16.1  | 4.2                                                         | 0.037   | 22.8                                                        | <0.001  |
|                       |          |                         |       |           |              |       | % difference | 33.76                                                        |                                        |                          |      |           |                      | % difference | 6.7       |                                                             |         | % difference                                                | 28.1    |

To study the significance of faith-based hospitals, a sensitivity analysis was carried out on the Tanzania dataset. All the equity gaps in hospital uptake studied (rich-poor, parity 0-parity ≥5, rich-poor at parity 0, rich-poor at parity 5, RNPM) were greater when the faith-based facilities were included in the numerators. The pp difference between utilization in rich and poor women was 26% greater when public and faith-based facilities were included in the numerator. Among women at high parity (≥5), the pp difference was 7% greater.
