# Supplementary figures and images for: Inequalities in use of hospitals for childbirth among rural women in sub-Saharan Africa: a comparative analysis of 18 countries using Demographic and Health Survey data
Source: PubMed Central journal article supplement — BMJ Glob Health. 2024 Jan 23;9(1):e013029. doi: 10.1136/bmjgh-2023-013029 (PMC10806834; doi:10.1136/bmjgh-2023-013029), 2024-01-23

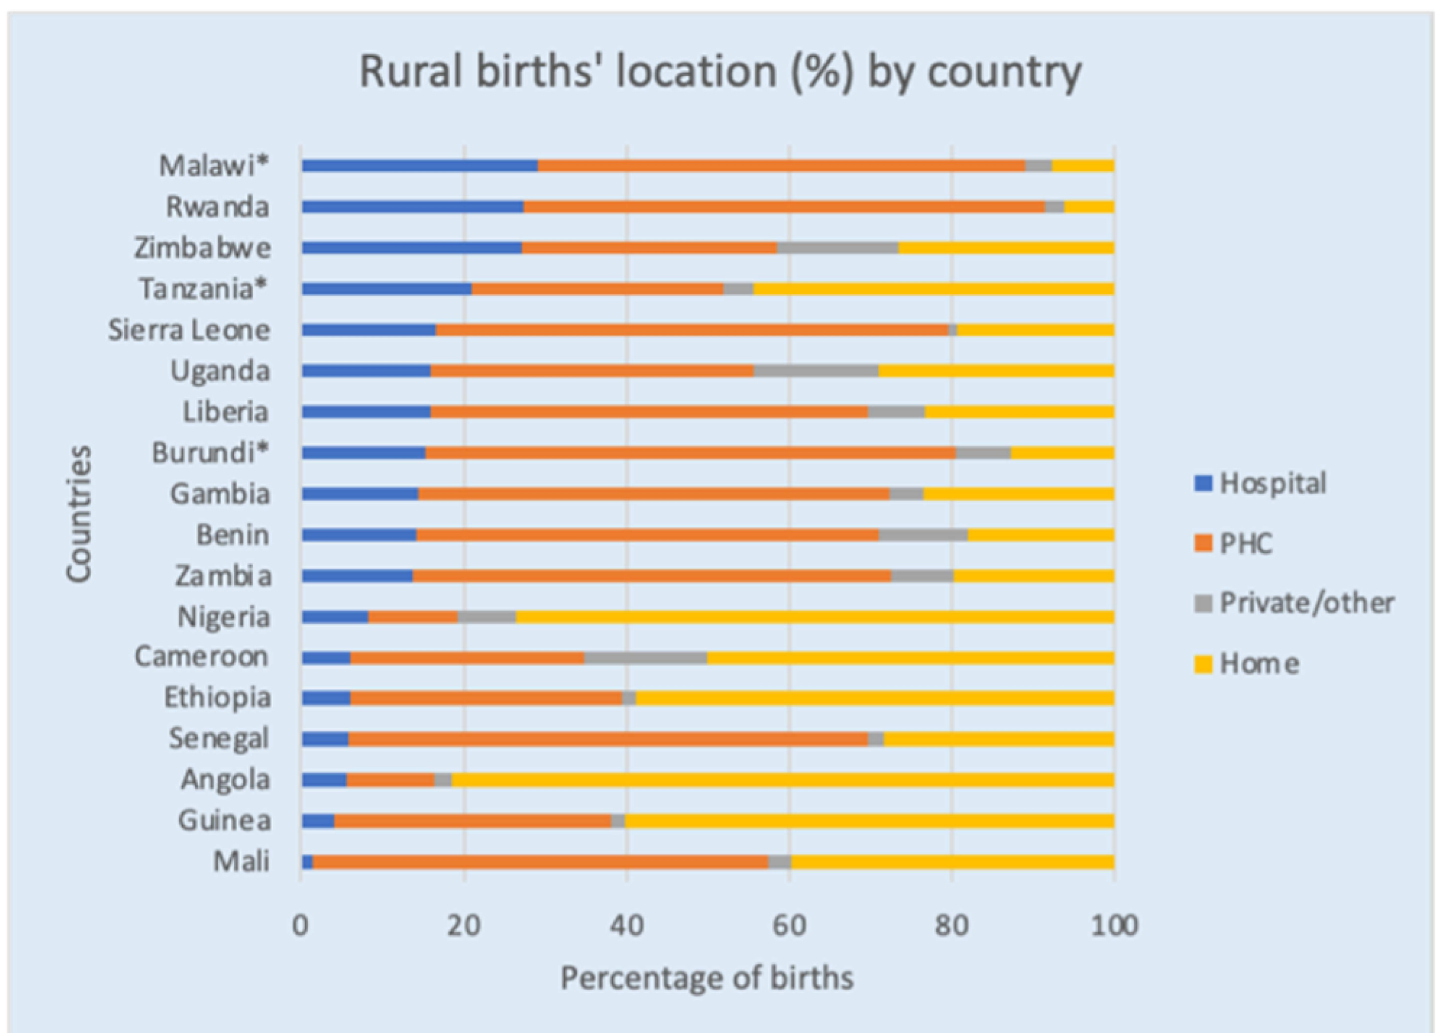

Supplement: bmjgh-2023-013029supp001.pdf [file bmjgh-2023-013029supp001.pdf]
